# Supplementary material for: Nicotine Prevents Oxidative Stress-Induced Hippocampal Neuronal Injury Through α7-nAChR/Erk1/2 Signaling Pathway
Source: Front Mol Neurosci. 2020 Nov 12;13:557647. doi: 10.3389/fnmol.2020.557647 (PMC7717967; doi:10.3389/fnmol.2020.557647)
Supplement: Supplementary file 1 [file Table_1.xlsx]

## Sheet: 板 1 - Sheet1
Software Version	3.03.14
Experiment File Path:	C:\Users\11\Desktop\Experiment 4.xpt
Protocol File Path:	C:\Users\Public\Documents\Protocols\450.prt
Plate Number
Date	2017-08-28
Time	11:14:47
Reader Type:	Epoch 2
Reader Serial Number:	1711217
Reading Type	Reader
Procedure Details
Plate Type	96 WELL PLATE
Eject plate on completion
Read	Absorbance Endpoint
	Full Plate
	Wavelengths: 450
	Read Speed: Normal, Delay: 100 msec, Measurements/Data Point: 8
Results
Actual Temperature:	27.8							H2O2 (μM)
			Control	Control	50	100	200	400	600	800	1000	600
		1	2	3	4	5	6	7	8	9	10	11	12
	A	0.041	0.042	0.043	0.042	0.041	0.041	0.041	0.041	0.041	0.044	0.042	0.043	450
	B	0.044	0.775	0.745	0.731	0.773	0.705	0.493	0.329	0.187	0.193	0.309	0.042	450
	C	0.044	0.726	0.711	0.778	0.766	0.781	0.559	0.336	0.186	0.196	0.343	0.052	450
	D	0.045	0.604	0.916	0.881	0.694	0.726	0.65	0.307	0.203	0.197	0.354	0.043	450
	E	0.043	0.846	0.83	0.747	0.757	0.805	0.623	0.3	0.203	0.235	0.364	0.042	450
	F	0.044	0.688	0.782	0.713	0.815	0.724	0.703	0.314	0.192	0.186	0.446	0.043	450
	G	0.044	0.89	0.726	0.774	0.816	0.693	0.574	0.349	0.18	0.181	0.401	0.045	450
	H	0.043	0.044	0.047	0.044	0.044	0.044	0.04	0.082	0.051	0.05	0.043	0.045	450
			h2o2 concentration
			c	c	50	100	200	400	600	800	1000	600
			0.775	0.745	0.731	0.773	0.705	0.493	0.329	0.187	0.193	0.309
			0.726	0.711	0.778	0.766	0.781	0.559	0.336	0.186	0.196	0.343
			0.604	0.916	0.881	0.694	0.726	0.65	0.307	0.203	0.197	0.354
			0.846	0.83	0.747	0.757	0.805	0.623	0.3	0.203	0.235	0.364
			0.688	0.782	0.713	0.815	0.724	0.703	0.314	0.192	0.186	0.446
			0.89	0.726	0.774	0.816	0.693	0.574	0.349	0.18	0.181	0.401
			0.754833	0.785	0.770667	0.770167	0.739	0.600333	0.3225	0.191833	0.198	0.3695
